# Supplementary material
Source: PubMed Central journal article supplement (PMC7292757)
Supplement: NIHMS1586783-supplement-1.pdf [file NIHMS1586783-supplement-1.pdf]

**Table S1. List of primers used in this study for variant discovery**

| <b>Template</b> | <b>Gene</b>   | <b>Primer forward</b> | <b>Primer reverse</b> | <b>Expected size (bp)</b> |
|-----------------|---------------|-----------------------|-----------------------|---------------------------|
| cDNA            | <i>Col6a1</i> | GTACCGGCGCAACTTCAC    | TCGTCACCTCGGTAACCTTT  | 819                       |
|                 |               | CGGACGGAAAGGAGAGAAG   | TTGACCAGCTCGTCCCTACT  | 855                       |
|                 |               | CAAGGTGAGCTGTCTGGAGAT | CCCCTTGGCTCCTTTCAC    | 496                       |
|                 | <i>Col6a2</i> | AGGACCCAAGGGTGTTCCT   | GGTCCTGGGGATCCTCTT    | 840                       |
|                 |               | AGAGGTGGGGAACAAAGGAG  | GCAGGTTGAGGTCGTCGT    | 863                       |
|                 |               | CAGCCAGATGCAAAGAATCA  | ACTGTCCCGTCCTGAGTCAC  | 886                       |
|                 | <i>Col6a3</i> | ATCGGGCCAAAGGGTATTC   | CTCCCTTTGGACCTGGGTAT  | 826                       |
|                 |               | AGGAACGAAGGGCAACAAG   | TCCGTTTCTCACTCGCTTAAA | 886                       |
|                 |               | CTCGACAACATCGCTGAGAA  | AAACCTTGAGTGCCGTTTAC  | 191                       |
|                 | gDNA          | <i>Col6a3</i>         | aaggaagcggacaggatfff  | ccatcgagtctctccctctg      |
